# Supplementary material for: Acute Prosthetic Joint Infections with Poor Outcome Caused by Staphylococcus Aureus Strains Producing the Panton–Valentine Leukocidin
Source: MDPI journal article supplement (doi:10.3390/biomedicines11061767), 2023-06-20
Supplement: s1 [file s1]

## Supplementary materials

**Table S1.** Haematochemical parameters at PJI onset.

|                                 | PVL negative          | PVL positive         | Overall               | p    |
|---------------------------------|-----------------------|----------------------|-----------------------|------|
| N                               | (n=7)                 | (n=5)                | (n=12)                |      |
| CRP <sup>h</sup> , median [IQR] | 86.00 [75.15, 195.60] | 57.00 [38.00, 99.00] | 83.50 [64.88, 150.30] | 0.12 |
| ESR <sup>i</sup> , mean (SD)    | 80.71 (16.87)         | 77.60 (14.21)        | 79.42 (15.20)         | 0.74 |
| WBC <sup>l</sup> , mean (SD)    | 9118.24 (7043.68)     | 9078.21 (5116.14)    | 9101.56 (6048.17)     | 0.99 |
| Neutrophils, mean (SD)          | 7375.90 (6198.02)     | 8061.12 (4580.38)    | 7661.41 (5357.93)     | 0.84 |
| HB <sup>m</sup> , mean (SD)     | 11.30 (1.50)          | 12.56 (1.59)         | 11.82 (1.60)          | 0.19 |
| Proteins, mean (SD)             | 6.15 (0.77)           | 6.00 (0.78)          | 6.08 (0.72)           | 0.79 |

<sup>h</sup>: C reactive protein; <sup>i</sup>: erythrocyte sedimentation rate; <sup>l</sup>: white blood cells; <sup>m</sup>: haemoglobin.

**Table S2.** Haematochemical parameters and length of hospitalization at discharge (after iv antibiotic treatment).

|                                      | PVL negative         | PVL positive         | Overall              | p    |
|--------------------------------------|----------------------|----------------------|----------------------|------|
| N                                    | (n=7)                | (n=5)                | (n=12)               |      |
| CRP <sup>h</sup> , median [IQR]      | 20.80 [13.54, 23.12] | 27.00 [16.50, 81.00] | 21.70 [14.28, 34.50] | 0.37 |
| ESR <sup>i</sup> , median [IQR]      | 42.00 [38.50, 56.00] | 48.00 [45.00, 53.00] | 46.50 [39.25, 55.75] | 0.52 |
| WBC <sup>l</sup> , mean (SD)         | 6697.14 (1848.65)    | 8738.00 (2179.68)    | 7547.50 (2167.06)    | 0.11 |
| Neutrophils, mean (SD)               | 3611.43 (1387.04)    | 5320.00 (2715.17)    | 4323.33 (2122.31)    | 0.18 |
| HB <sup>m</sup> , mean (SD)          | 11.39 (1.04)         | 10.88 (1.30)         | 11.18 (1.13)         | 0.47 |
| Proteins, mean (SD)                  | 5.67 (0.91)          | 5.58 (0.73)          | 5.61 (0.74)          | 0.89 |
| Hospitalization (days), median [IQR] | 25.00 [17.00, 40.50] | 14.00 [10.00, 15.00] | 15.50 [14.00, 26.75] | 0.03 |

<sup>h</sup>: C reactive protein; <sup>i</sup>: erythrocyte sedimentation rate; <sup>l</sup>: white blood cells; <sup>m</sup>: haemoglobin.

**Table S3.** Microbiological data, antimicrobial therapy, type of surgical treatment and outcome of patients with PJI due to Pantone Valentine (PVL)-producing *S. aureus*.

| N. | Sex | Age | Methicillin susceptible/<br>resistance<br>SA strain | PVL | SURGICAL<br>PROCEDURE | I.V. <sup>a</sup> ANTIBIOTIC<br>(days of treatment) | SEQUENTIAL ORAL ANTIBIOTIC<br>(days of treatment)   | OUTCOME<br>(n. of days)* |
|----|-----|-----|-----------------------------------------------------|-----|-----------------------|-----------------------------------------------------|-----------------------------------------------------|--------------------------|
| 1  | F   | 60  | MSSA <sup>g</sup>                                   | -   | DAIR <sup>d</sup>     | vancomycin 2 g (14)                                 | cotrimoxazole 3 x 160/800 mg + rifampin 900 mg (70) | REMISSION (730)          |
| 2  | F   | 79  | MSSA                                                | +   | DAIR                  | vancomycin 2 g (15)                                 | cotrimoxazole 3 x 160/800 mg (63)                   | FAILURE (63)             |
| 3  | M   | 46  | MRSA <sup>f</sup>                                   | +   | TWO-STAGE REVISION    | vancomycin 2 g (10)                                 | Doxycycline 2 x 100 mg (77)                         | REMISSION (730)          |
| 4  | M   | 59  | MRSA                                                | -   | DAIR                  | daptomicin 850 mg (49)                              | Doxycycline 2 x 100 mg (35)                         | REMISSION (730)          |
| 5  | F   | 79  | MSSA                                                | -   | TWO-STAGE REVISION    | vancomycin 2 g (28)                                 | Doxycycline 2 x 100 mg (63)                         | REMISSION (365)          |
| 6  | F   | 74  | MSSA                                                | -   | DAIR                  | vancomycin 2 g (9), cefazolin 3 x 2 g (6)           | Cotrimoxazole 3 x 160/800 mg + rifampin 900 mg (70) | REMISSION (545)          |
| 7  | M   | 87  | MSSA                                                | +   | ONE-STAGE REVISION    | vancomycin 2 g (7), cefazolin 3 x 2 g (7)           | Doxycycline 2 x 100 mg (70)                         | REMISSION (425)          |
| 8  | M   | 43  | MSSA                                                | +   | DAIR                  | vancomycin 2 g (8), cefazolin 3 x 2 g (8)           | Levofloxacin 2 x 500 mg + rifampicin 900 mg (21)    | FAILURE (37)             |
| 9  | M   | 61  | MSSA                                                | -   | DAIR                  | vancomycin 2 g (9), cefazolin 3 x 2 g (10)          | Levofloxacin 2 x 500 mg +rifampicin 900 mg (70)     | REMISSION (425)          |
| 10 | F   | 69  | MSSA                                                | -   | DAIR                  | vancomycin 2 g (12), cefazolin 3 x 2 g (13)         | Cotrimoxazole 3 x 160/800 mg + rifampin 900 mg (63) | REMISSION (365)          |
| 11 | M   | 64  | MSSA                                                | -   | DAIR                  | vancomycin 2 g (56) + rifampin 900 mg (42)          | Cotrimoxazole 3 x 160/800 mg + rifampin 900 mg (42) | REMISSION (665)          |
| 12 | F   | 68  | MSSA                                                | +   | DAIR                  | daptomicin 700 mg (7)                               | Doxycycline 2 x 100 mg (70)                         | FAILURE (77)             |

<sup>a</sup>: Intravenous; <sup>g</sup>: methicillin-sensitive *Staphylococcus aureus*; <sup>f</sup>: methicillin-resistant *Staphylococcus aureus*; <sup>d</sup>: debridement, antibiotic, implant retention. \*Number of days: (1) after open debridement in case of failure and (2) after finishing antibiotic in case of remission.
